# Supplementary material for: Numerical Analysis of Droplet Impacting on an Immiscible Liquid via Three-Phase Field Method
Source: Micromachines (Basel). 2023 Apr 27;14(5):951. doi: 10.3390/mi14050951 (PMC10223795; doi:10.3390/mi14050951)
Supplement: Supplementary file 1 [file micromachines-14-00951-s001.zip]

Archive with 8 entries (8 files):
- Supplemental Information.pdf
- Video S1 The process of droplet impacting.avi
- Video S2 Influence of fluid viscosity on droplet impacting.avi
- Video S3 Influence of fluid density on droplet impacting.avi
- Video S4 Influence of interfacial tensions on impacting.avi
- Video S5 Influence of impacting velocity on impacting.avi
- Video S6 Influence of droplet diameter on impacting.avi
- Video S7 Influence of non-Newtonian properties of fluid.avi
